# Supplementary material
Source: publisher figshare collection journal article supplement (https://diabetesjournals.figshare.com/articles/dataset/_/18624830)
Supplement: Supplementary file 2 [file 1]

# Supplements

**Suppl. Table 1**

| Primary Antibody                       | Dilution |         |          | Host    | Catalog Number | Supplier                                               |
|----------------------------------------|----------|---------|----------|---------|----------------|--------------------------------------------------------|
|                                        | IHC      | WB      | MELC     |         |                |                                                        |
| Anti-Claudin-1                         | 1:200    | 1:500   | -        | rabbit  | LS-B16533-50   | LSBio, Seattle, USA                                    |
| Anti-GAPDH, clone 6C5                  | -        | 1:1000  | -        | mouse   | 8245           | Abcam, Cambridge, UK                                   |
| Anti-VEGF-A, clone 56/1                | -        | 1:500   | -        | mouse   | MABC595        | Sigma Aldrich, Merck, Deisenhofen, Germany             |
| Anti-ZO-1                              | 1:200    | 1:500   | -        | rabbit  | 61-7300        | Invitrogen, ThermoFisher Scientific, Waltham, MA, USA  |
| CD4 FITC, clone L3T4                   | -        | -       | 1:200    | rat     | 1540-02        | SoutherBiotech, Birmingham, AL, USA                    |
| CD8a FITC, clone 53-6.7                | -        | -       | 1:200    | rat     | 553030         | BDPHarmingen, San Diego, CA, USA                       |
| CD11b FITC, clone M1/70.15             | -        | -       | 1:800    | rat     | MCA74F         | Bio-Rad Laboratories, Hercules, CA, USA                |
| CD11c PE, clone N418                   | -        | -       | 1:200    | hamster | 130-122-952    | Miltenyi Biotec, Bergisch Gladbach, Germany            |
| CD22 APC, clone Cy34.1                 | -        | -       | 1:100    | mouse   | 130-102-576    | Miltenyi Biotec, Bergisch Gladbach, Germany            |
| CD29 (GP1Ia) APC, clone HM $\beta$ 1-1 | -        | -       | 1:400    | hamster | 130-123-829    | Miltenyi Biotec, Bergisch Gladbach, Germany            |
| CD31 PE, clone MEC13.3                 | -        | -       | 1:800    | rat     | 553373         | BDBiosciences, Franklin Lakes, NJ, USA                 |
| CD335 FITC, clone 29A1.4               | -        | -       | 1:200    | rat     | 11-3351-82     | Invitrogen, ThermoFisher Scientific, Waltham, MA, USA  |
| F4-80 FITC, clone BM8                  | -        | -       | 1:400    | rat     | 123107         | Biolegend, San Diego, CA, USA                          |
| Iba1 FITC, clone 1022-5                | -        | -       | 1:200    | mouse   | ab15691        | Abcam, Cambridge, UK                                   |
| Ly6C APC, clone HK1.4                  | -        | -       | 1:400    | rat     | 17-5932-82     | eBioscience, ThermoFisher Scientific, Waltham, MA, USA |
| Ly6G (Gr-1) PE, clone RB6-8C5          | -        | -       | 1:400    | rat     | 12-5931-82     | eBioscience, ThermoFisher Scientific, Waltham, MA, USA |
| Propidium Iodide                       | -        | -       | 1:16,000 | -       | P4170          | Sigma Aldrich, Merck, Deisenhofen, Germany             |
| Siglec F PE, clone E50-2440            | -        | -       | 1:200    | rat     | 552126         | BDBiosciences, Franklin Lakes, NJ, USA                 |
| Anti-mouse IRDye 800 CW                | -        | 1:10000 | -        | goat    | 926-32210      | LI-COR, Lincoln Nebraska, USA                          |
| Anti-mouse IRDye 680 RD                | -        | 1:10000 | -        | goat    | 926-68070      | LI-COR, Lincoln Nebraska, USA                          |
| Anti-rabbit IRDye 800 CW               | -        | 1:10000 | -        | goat    | 926-32211      | LI-COR, Lincoln Nebraska, USA                          |
| Anti-rabbit red IRDye 680 RD           | -        | 1:10000 | -        | goat    | 926-68071      | LI-COR, Lincoln Nebraska, USA                          |
| Anti-rabbit Cy3                        | 1:100    | -       | -        | goat    | R9130          | Sigma, Merck, Deisenhofen, Germany                     |
| Anti-rabbit FITC                       | 1:100    | -       | -        | goat    | F1262          | Sigma, Merck, Deisenhofen, Germany                     |

## ***Suppl. T1. List of antibodies.***

Antibodies used for western blot (WB), immunohistochemistry (IHC) and multi-epitope ligand cartography (MELC) experiments are listed.

# Supplements

**Suppl. Table 2**

| Triglycerides | WT         |             | GPR40 <sup>-/-</sup> |            | P value<br>(WT BL<br>vs. 14d) | P value<br>(GPR40 <sup>-/-</sup> BL<br>vs. 14d) | P value<br>(WT BL vs.<br>GPR40 <sup>-/-</sup> BL) | P Value<br>(WT 14d vs.<br>GPR40 <sup>-/-</sup> 14d) |
|---------------|------------|-------------|----------------------|------------|-------------------------------|-------------------------------------------------|---------------------------------------------------|-----------------------------------------------------|
|               | BL<br>n=19 | 14d<br>n=10 | BL<br>n=7            | 14d<br>n=5 |                               |                                                 |                                                   |                                                     |
| TG 42:2       | 0.0029     | 0.0036      | 0.0037               | 0.0057     | n.s. p =0.4066                | * p =0.0251                                     | n.s. p =0.3290                                    | ** p =0.0090                                        |
| TG 48:0       | 0.3658     | 0.5019      | 0.3804               | 0.6010     | *** p =0.0008                 | *** p =0.0003                                   | n.s. p >0.9999                                    | n.s. p =0.0992                                      |
| TG 48:1       | 0.4462     | 0.1848      | 0.5906               | 0.1714     | * p =0.0393                   | * p =0.0260                                     | n.s. p =0.4827                                    | n.s. p >0.9999                                      |
| TG 48:2       | 0.5250     | 0.1764      | 0.6676               | 0.1902     | * p =0.0336                   | n.s. p =0.0558                                  | n.s. p =0.7427                                    | n.s. p >0.9999                                      |
| TG 48:3       | 0.1137     | 0.0919      | 0.1616               | 0.0970     | n.s. p =0.8665                | n.s. p =0.2502                                  | n.s. p =0.2639                                    | n.s. p >0.9999                                      |
| TG 48:4       | 0.0205     | 0.0363      | 0.0199               | 0.0349     | n.s. p =0.0590                | n.s. p =0.3202                                  | n.s. p >0.9999                                    | n.s. p >0.9999                                      |
| TG 50:1       | 1.8154     | 2.0265      | 2.1586               | 1.6900     | n.s. p >0.9999                | n.s. p =0.9104                                  | n.s. p =0.9375                                    | n.s. p >0.9999                                      |
| TG 50:2       | 4.2805     | 2.8420      | 6.1086               | 2.7820     | n.s. p =0.2150                | * p =0.0304                                     | n.s. p =0.1440                                    | n.s. p >0.9999                                      |
| TG 50:3       | 1.7221     | 0.9702      | 2.6371               | 1.1450     | n.s. p =0.0595                | ** p =0.0098                                    | * p =0.0400                                       | n.s. p >0.9999                                      |
| TG 50:4       | 0.2603     | 0.2481      | 0.3834               | 0.2900     | n.s. p >0.9999                | n.s. p =0.4858                                  | n.s. p =0.0908                                    | n.s. p >0.9999                                      |
| TG 52:1       | 0.5023     | 0.7906      | 0.6224               | 0.6770     | n.s. p =0.1156                | n.s. p >0.9999                                  | n.s. p =0.9511                                    | n.s. p >0.9999                                      |
| TG 52:2       | 9.1826     | 9.7460      | 15.0286              | 9.6700     | n.s. p >0.9999                | n.s. p =0.0617                                  | ** p =0.0050                                      | n.s. p >0.9999                                      |
| TG 52:3       | 8.6668     | 12.3030     | 13.9143              | 13.1000    | * p =0.0497                   | n.s. p >0.9999                                  | * p =0.0101                                       | n.s. p >0.9999                                      |
| TG 52:4       | 3.9900     | 7.2540      | 5.5900               | 7.8600     | ** p =0.0064                  | n.s. p =0.3034                                  | n.s. p =0.3601                                    | n.s. p >0.9999                                      |
| TG 52:5       | 0.7547     | 1.6949      | 0.8839               | 1.6792     | ** p =0.0036                  | n.s. p =0.1309                                  | n.s. p >0.9999                                    | n.s. p >0.9999                                      |
| TG 54:1       | 0.1268     | 0.1271      | 0.0983               | 0.0902     | n.s. p >0.9999                | n.s. p >0.9999                                  | n.s. p =0.8342                                    | n.s. p =0.7953                                      |
| TG 54:2       | 1.0194     | 1.4376      | 1.3906               | 1.2970     | n.s. p =0.2511                | n.s. p >0.9999                                  | n.s. p =0.4536                                    | n.s. p >0.9999                                      |
| TG 54:3       | 1.0194     | 1.4376      | 1.3906               | 1.2970     | ** p =0.0028                  | n.s. p =0.5223                                  | n.s. p =0.1240                                    | n.s. p >0.9999                                      |
| TG 54:4       | 3.7068     | 8.9790      | 4.8614               | 9.4160     | ** p =0.0011                  | n.s. p =0.0704                                  | n.s. p =0.9353                                    | n.s. p >0.9999                                      |
| TG 54:5       | 3.2384     | 8.6840      | 3.7757               | 8.6740     | ** p =0.0014                  | n.s. p =0.0660                                  | n.s. p >0.9999                                    | n.s. p >0.9999                                      |
| TG 54:6       | 1.5061     | 4.7780      | 1.6483               | 4.7500     | ** p =0.0018                  | n.s. p =0.0566                                  | n.s. p >0.9999                                    | n.s. p >0.9999                                      |
| TG 56:1       | 0.0236     | 0.0337      | 0.0177               | 0.0275     | n.s. p =0.3020                | n.s. p =0.6917                                  | n.s. p =0.9090                                    | n.s. p >0.9999                                      |
| TG 56:2       | 0.1374     | 0.1544      | 0.1078               | 0.1134     | n.s. p >0.9999                | n.s. p >0.9999                                  | n.s. p =0.9017                                    | n.s. p =0.8028                                      |
| TG 56:3       | 0.3092     | 0.4287      | 0.4343               | 0.3504     | n.s. p =0.2095                | n.s. p =0.8818                                  | n.s. p =0.2650                                    | n.s. p =0.8838                                      |
| TG 56:4       | 0.2454     | 0.3766      | 0.3497               | 0.3372     | * p =0.0288                   | n.s. p >0.9999                                  | n.s. p =0.1586                                    | n.s. p >0.9999                                      |
| TG 56:6       | 0.5105     | 1.1485      | 0.9024               | 1.3864     | *** p =0.0005                 | n.s. p =0.0966                                  | n.s. p =0.0697                                    | n.s. p =0.5802                                      |
| TG 58:1       | 0.0073     | 0.0117      | 0.0056               | 0.0095     | n.s. p =0.1210                | n.s. p =0.5103                                  | n.s. p >0.9999                                    | n.s. p =0.9937                                      |
| TG 58:2       | 0.0259     | 0.0449      | 0.0206               | 0.0391     | n.s. p =0.0810                | n.s. p =0.3548                                  | n.s. p >0.9999                                    | n.s. p >0.9999                                      |
| TG 58:3       | 0.0467     | 0.0753      | 0.0428               | 0.0656     | n.s. p =0.1101                | n.s. p =0.5974                                  | n.s. p >0.9999                                    | n.s. p >0.9999                                      |
| TG 58:4       | 0.0346     | 0.0579      | 0.0352               | 0.0475     | * p =0.0353                   | n.s. p =0.7754                                  | n.s. p >0.9999                                    | n.s. p =0.8655                                      |
| TG 58:6       | 0.0561     | 0.1035      | 0.1051               | 0.1348     | ** p =0.0053                  | n.s. p =0.3712                                  | * p =0.0111                                       | n.s. p =0.2740                                      |

**Suppl. T2. Plasma levels of triglycerides in naïve and STZ-treated WT and GPR40<sup>-/-</sup> mice.**

Wild type and GPR40<sup>-/-</sup> mice were analyzed for triglycerides in the plasma. Naïve mice and mice 14 days after STZ-injection were analyzed by LC-QTOFMS (values of chromatographic peak area) (WT BL n=19; 14d n= 10; GPR40<sup>-/-</sup> BL n=7; 14d n=5). 2way ANOVA/Bonferroni post hoc test; p values are included in data table; n.s.= non-significant.

# Supplements

**Suppl. Table 3**

| Free fatty acids           | Experiment | WT          |             | GPR40 <sup>-/-</sup> |             | P value<br>(WT BL<br>vs. 14d) | P value<br>(GPR40 <sup>-/-</sup> BL<br>vs. 14d) | P value<br>(WT BL vs.<br>GPR40 <sup>-/-</sup> BL) |
|----------------------------|------------|-------------|-------------|----------------------|-------------|-------------------------------|-------------------------------------------------|---------------------------------------------------|
|                            |            | BL          | 14d         | BL                   | 14d         |                               |                                                 |                                                   |
| Oleic acid 18:1            | LC-QTOFMS  | 74.9889     | 94.5300     | 102.7000             | 128.5000    | n.s. p =0.0919                | n.s. p =0.3304                                  | n.s. p =0.0642                                    |
| Linoleic acid 18:2         |            | 42.7453     | 69.4400     | 42.6571              | 76.8000     | **p =0.0067                   | *p =0.0161                                      | n.s. p =0.9933                                    |
| Linolenic acid 18:3        |            | 3.8732      | 5.9980      | 3.4857               | 5.9100      | **p =0.0024                   | *p =0.0345                                      | n.s. p =0.5707                                    |
| Stearidonic acid 18:4      |            | 0.1179      | 0.1503      | 0.0972               | 0.1404      | *p =0.0238                    | n.s. p =0.0825                                  | n.s. p =0.1362                                    |
| Eicosenoic acid 20:1       |            | 2.5078      | 2.3270      | 3.0371               | 2.8340      | n.s. p =0.5883                | n.s. p =0.7848                                  | n.s. p =0.2060                                    |
| Eicosadienoic acid 20:2    |            | 0.9532      | 1.0141      | 1.2700               | 1.4172      | n.s. p =0.6065                | n.s. p =0.4976                                  | *p =0.0227                                        |
| Arachidonic acid 20:4      |            | 27.8868     | 19.1000     | 32.9000              | 29.0600     | n.s. p =0.5162                | n.s. p =0.6211                                  | n.s. p =0.7594                                    |
| Eicosapentaenoic acid 20:5 |            | 0.9161      | 0.7967      | 0.7416               | 0.7550      | n.s. p =0.6757                | n.s. p =0.9349                                  | n.s. p =0.6093                                    |
| Docosatetraenoic acid 22:4 |            | 1.2243      | 1.8230      | 2.8571               | 3.0300      | **p =0.0063                   | n.s. p =0.7498                                  | ****p <0.0001                                     |
| Docosahexaenoic acid 22:6  |            | 12.1142     | 15.3900     | 18.8857              | 19.9000     | n.s. p =0.0903                | n.s. p =0.7484                                  | **p =0.0065                                       |
| Nervonic acid 24:1         |            | 0.2336      | 0.2330      | 0.2300               | 0.2204      | n.s. p =0.9791                | n.s. p =0.8077                                  | n.s. p =0.9066                                    |
| Linoleic acid 18:2         | LC-MS/MS   | 2698.6000   | 4612.2000   | 2845.1430            | 4938.8000   | **p =0.0025                   | *p =0.0226                                      | n.s. p =0.8075                                    |
| Arachidonic acid 20:4      |            | 519508.7000 | 407584.0000 | 631474.6000          | 591419.2000 | n.s. p =0.5946                | n.s. p =0.7355                                  | n.s. p =0.6586                                    |
| Docosahexaenoic acid 22:6  |            | 342557.4000 | 365095.8000 | 482105.7000          | 448055.6000 | n.s. p >0.9999                | n.s. p >0.9999                                  | * p =0.0380                                       |
| 20-HETE                    |            | n.d.        | n.d.        | n.d.                 | n.d.        |                               |                                                 |                                                   |

**Suppl. T3. Plasma levels of free fatty acids in naïve and STZ-treated mice.**

Wild type and GPR40<sup>-/-</sup> mice were analysed for free fatty acid concentrations in the plasma. Naïve mice and mice 14 days after STZ-injection were analysed by LC-QTOFMS (values of chromatographic peak area) or quantitative LC-MS/MS (values in pg/ml) (WT BL n=19; 14d n= 10; GPR40<sup>-/-</sup> BL n=7; 14d n=5). Unpaired two-tailed t-test; p values are included in data table; n.s. = non-significant; n.d. = not detectable

# Supplements

**Figure S1**

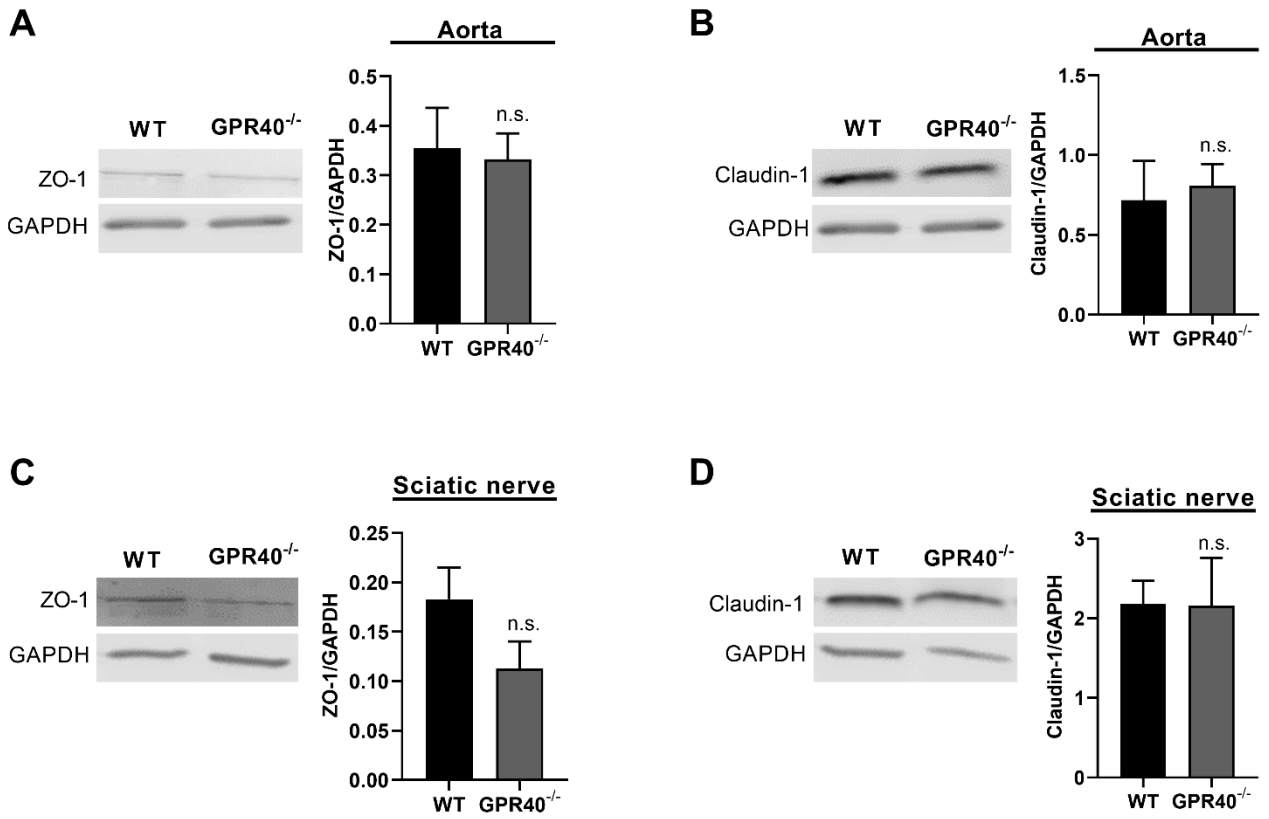

**Suppl. Fig. S1. Western Blot analysis of TJ proteins ZO-1 and Claudin-1.**

**A-C:** Representative Western Blot and data analysis of TJ proteins ZO-1 and Claudin-1 in aorta tissue (panel a+b) or in sciatic nerve (panel c+d) from naive wild type and GPR40<sup>-/-</sup> mice, Data normalized to GAPDH signal (n=6). Unpaired two-tailed t-test, n.s.= non-significant.

# Supplements

**Figure S2**

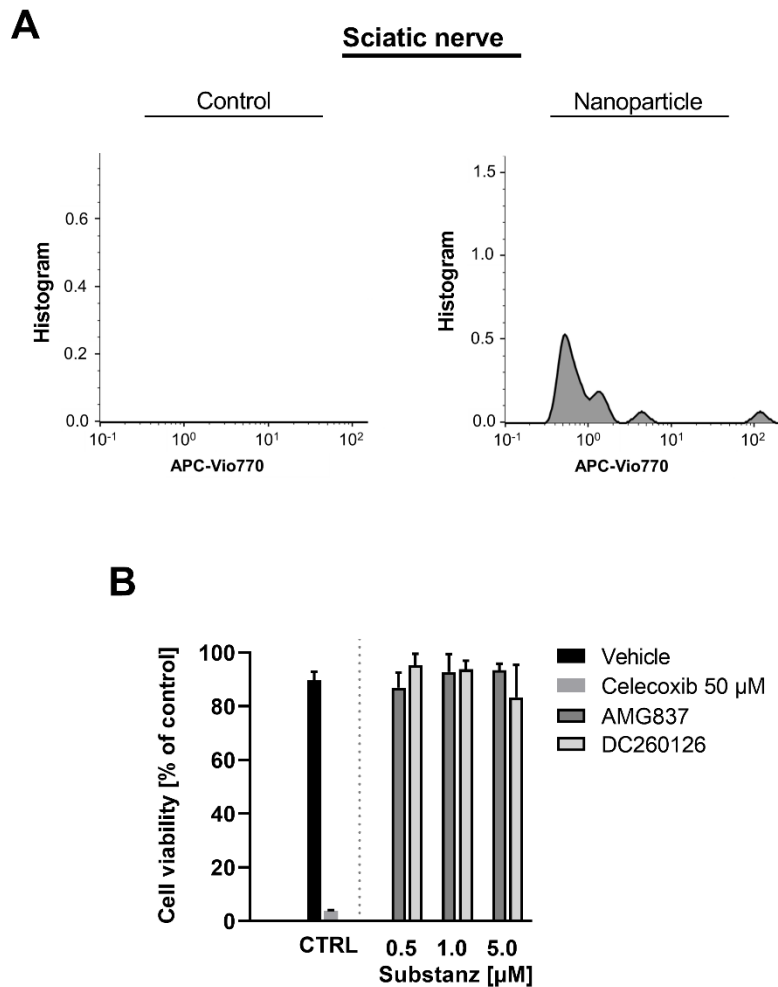

**Fig. S2. Nanoparticle FACS control and TEER cytotoxicity assay.**

**A:** Histograms of the nanoparticle FACS data of sciatic nerve cells (left, control) or of fluorescent nanoparticles (0.06 µm) in sciatic nerves (right). **B:** To test for cell toxicity HUVECs were incubated with the compounds for 24 hours. Orang reagent (Cambridge biosciences, UK) was added for 1 hour before determining absorbance at 450 nm (Enspire, PerkinElmer, Waltham, USA). OrangU cell toxicity test of HUVEC cells treated with DC260126, AMG837, celecoxib or DMSO (n=3).

## Supplements

### Figure S3

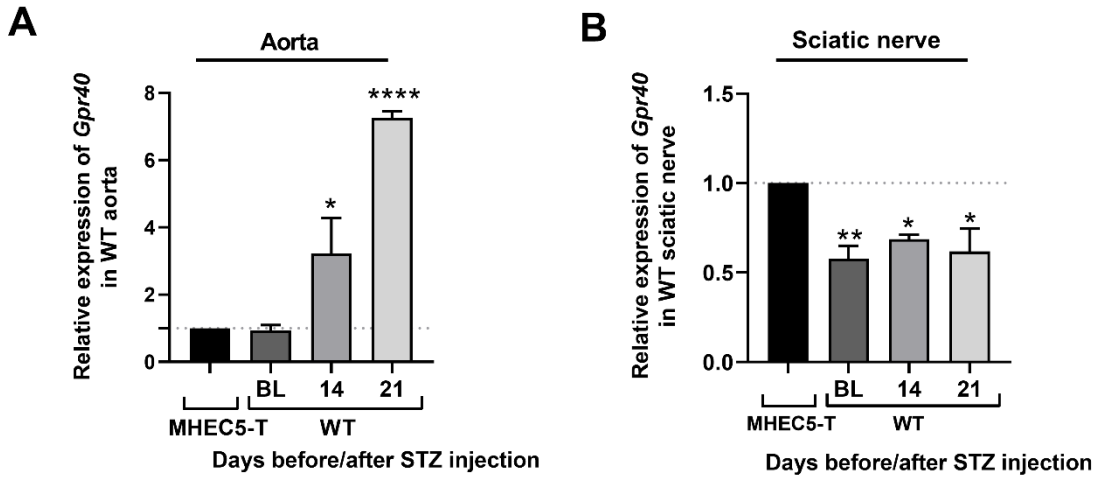

**Suppl. Fig. S3. *Gpr40* mRNA is expressed in MHEC5-T, aorta and sciatic nerves.**

*Gpr40* mRNA expression in MHEC5-T compared to WT aorta (A) or sciatic nerves (B) (n=4). One-way ANOVA/Bonferroni post hoc test; \*p<0.05; \*\*p <0.01 compared to MHEC5-T.

**Figure S4**

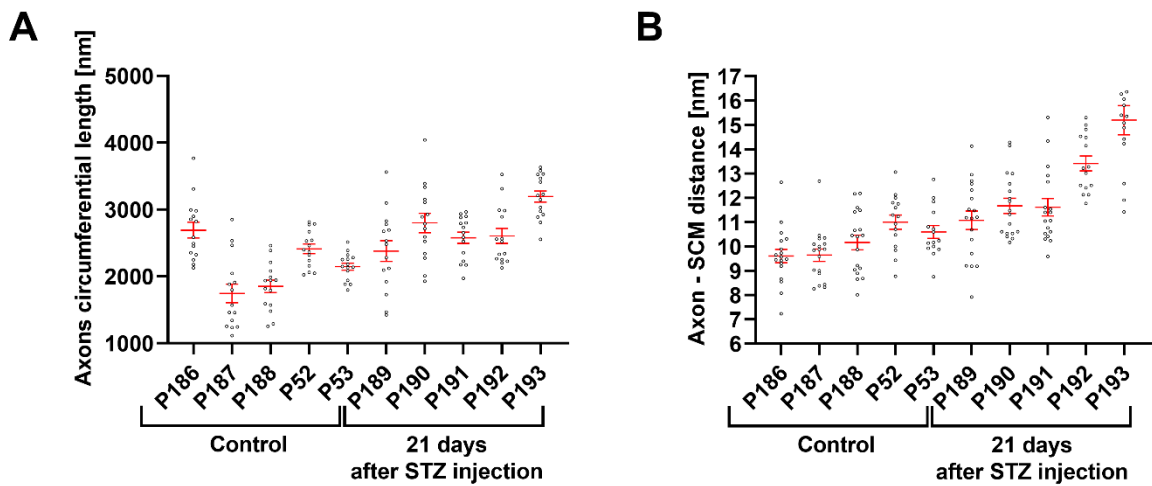

*Suppl. Fig. S4. Diabetes- induced swelling of axons and intercellular space.*

Quantitative analysis of unmyelinated and myelinated axons in individual naive mice or 21 days after STZ injection. The nonmyelinated axons of the nerve in mice with diabetes are swollen (panel A, 15 axons/mouse) and the intercellular spaces between axons and Schwann cells as well as between axon are enlarged compared (panel B, 18 axons/mouse).

# Supplements

**Figure S5**

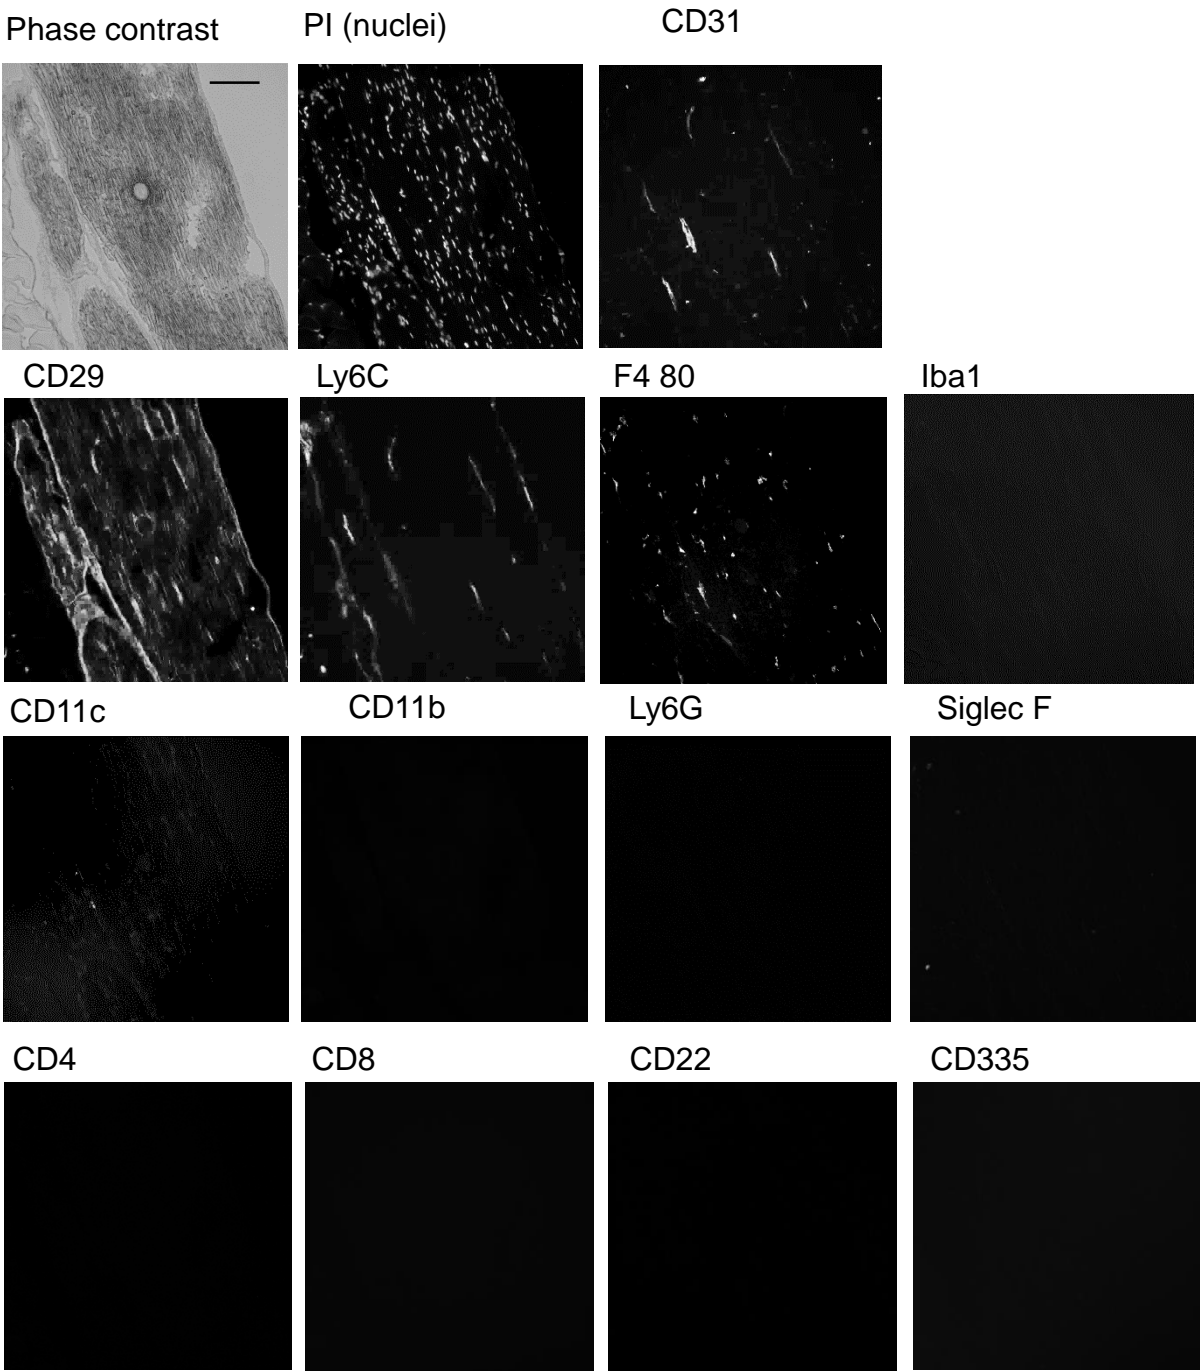

***Suppl. Fig. S5. Immune cells are not recruited to the sciatic nerve 3 weeks after STZ-injection.***

MELC analysis of sciatic nerves 3 weeks after STZ-injection shows no recruitment of macrophages, dendritic cells, neutrophils, eosinophils CD4- and CD8-Tcells, B-cells or NK-cells. Resident macrophages (F4 80+/Ly6C-) do not express the activation marker IB4. The black bar represents 100 µm.

For description of the MELC method for sequential immunohistology please see the supplementary methods. All antibodies are listed in the supplementary data as table T1.



**Figure S6**

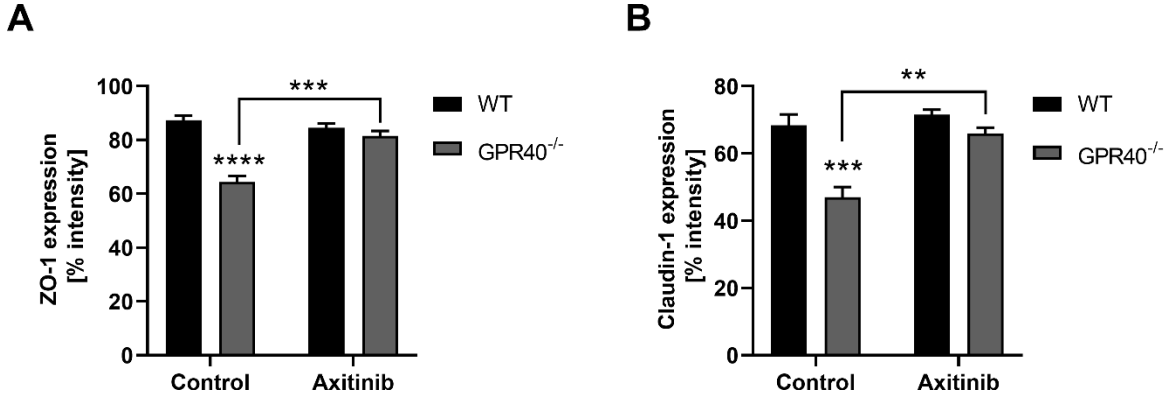

**Suppl. Fig. S6. Tight junction formation is recovered by Axitinib in naïve GPR40<sup>-/-</sup> mice.**

**A:** ZO-1 expression in sciatic nerve from naïve or Axitinib treated (two days in a row) wild type and GPR40<sup>-/-</sup> mice (control n=3, Axitinib n=4; 6 sections per mouse). 2way ANOVA/Bonferroni post hoc test; \*\*\*\*p<0.0001, \*\*\*p<0.001. **B:** Same as panel a with Claudin-1 expression (control n=3, Axitinib n=4; 6 sections per mouse). 2way ANOVA/Bonferroni post hoc test; \*\*\*p<0.001, \*\*p<0.01.

# Supplements

**Figure S7**

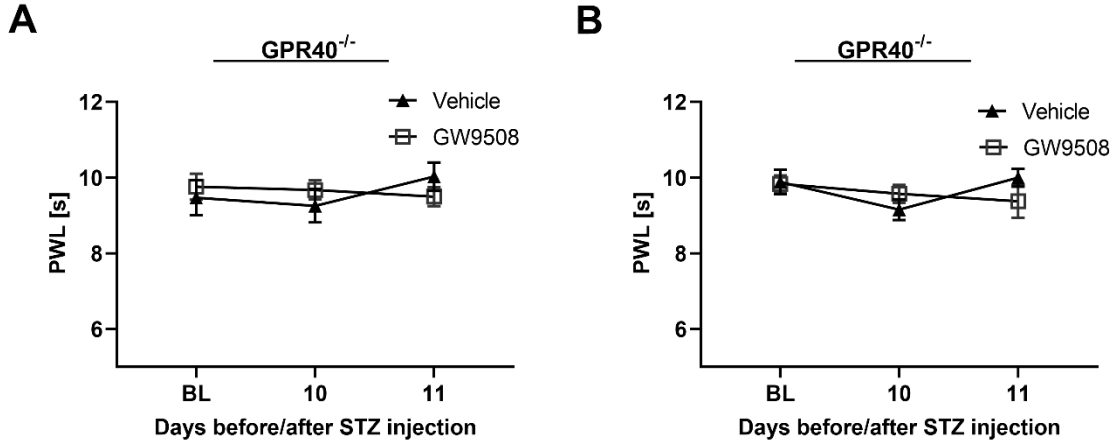

*Suppl. Fig. S7. The GPR40 agonist GW9508 does not influence thermal and mechanical hypersensitivities in GPR40<sup>-/-</sup> mice.*

**A,B:** Mechanical (panel a) and thermal (panel b) paw withdrawal latencies (PWL) during GW9508 treatment of GPR40<sup>-/-</sup> mice after 10/11 days after STZ injection (Vehicle n=7; GW9508 n=8). N-way repeated 2way ANOVA/Bonferroni post hoc test; n.s., non-significant.

# Supplements

**Figure S8**

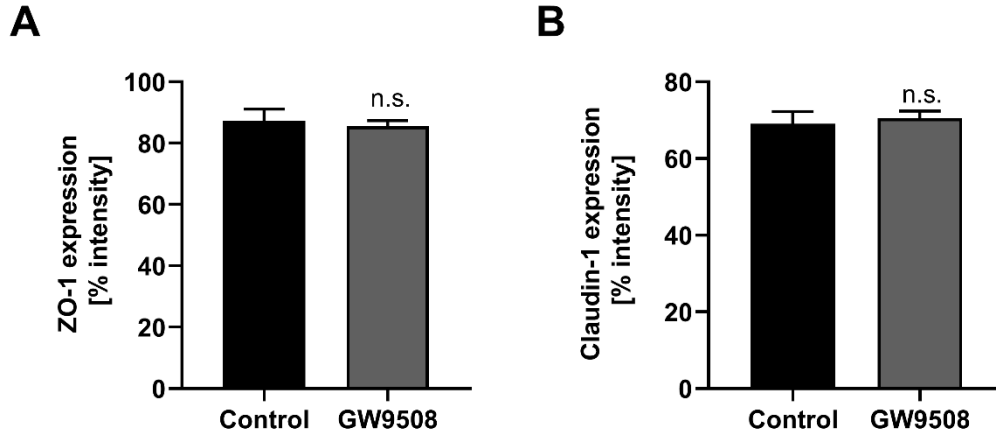

**Suppl. Fig. S8: Tight junction formation is not influenced by GW9508 treatment in WT mice**

**A:** ZO-1 expression in sciatic nerve from naïve or GW9508 treated (two days in a row) wild type mice (control n=3, GW9508 n=4; 6 sections per mouse; two-tailed unpaired t-test, n.s., non-significant). **B:** Same as panel a with Claudin-1 expression (control n=3, GW9508 n=4; 6 sections per mouse). Unpaired two-tailed t-test, n.s.= non-significant.

# Supplements

**Figure S9**

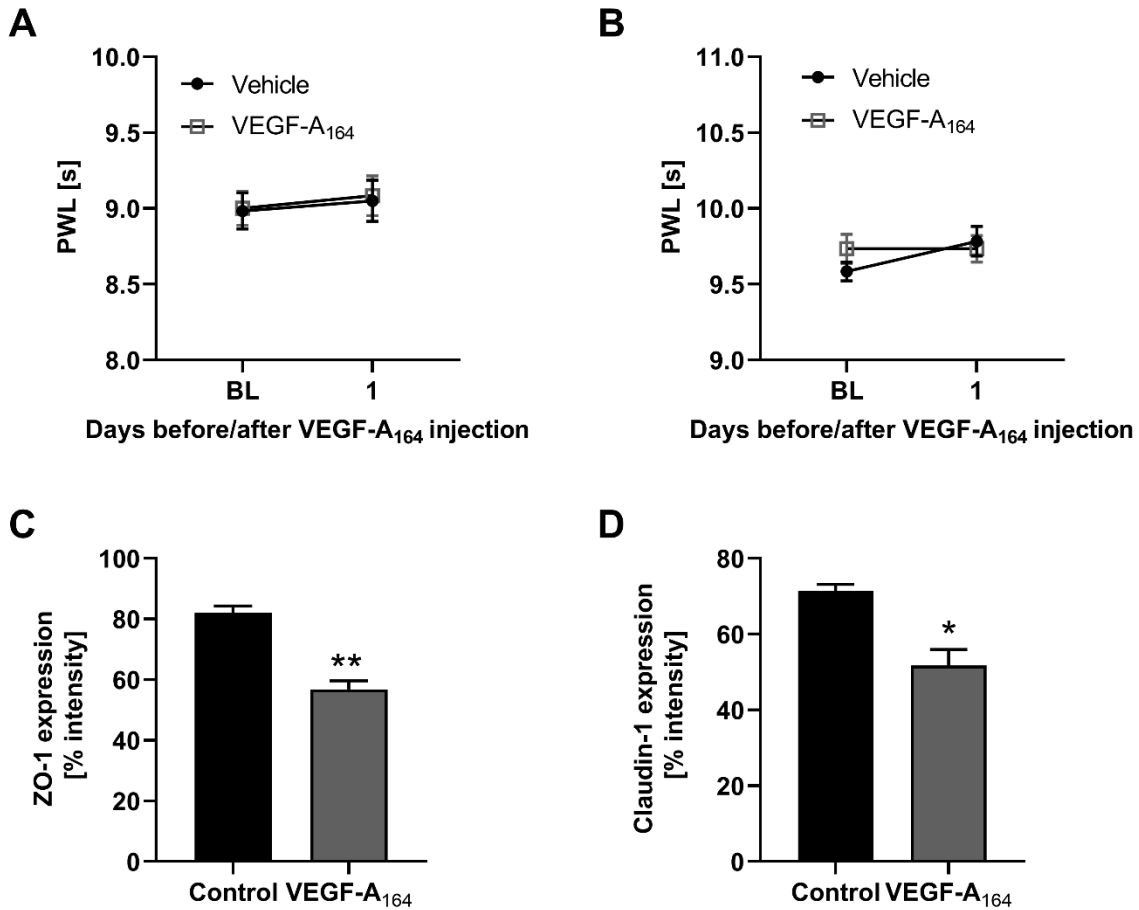

**Suppl. Fig. S9. Behavior is not influenced by VEGF-A<sub>164</sub> protein treatment, but tight junction formation is disturbed in WT mice.**

**A,B:** Mechanical (panel a) and thermal (panel b) paw withdrawal latencies (PWL) after VEGF-A<sub>164</sub> injection of WT mice (Vehicle n=6; VEGF-A<sub>164</sub> n=6). N-way repeated 2way ANOVA/Bonferroni post hoc test; n.s.= non-significant. **C:** ZO-1 expression in sciatic nerve from naïve or VEGF-A<sub>164</sub> treated wild type mice (control n=3, VEGF-A<sub>164</sub> n=4; 6 sections per mouse) Unpaired two-tailed t-test, n.s.= non-significant). **D:** Same as panel c with Claudin-1 expression (control n=3, VEGF-A<sub>164</sub> n=4; 6 sections per mouse). Unpaired two-tailed t-test, n.s.= non-significant.
